# Supplementary material for: High-quality permanent draft genome sequence of Bradyrhizobium sp. Ai1a-2; a microsymbiont of Andira inermis discovered in Costa Rica
Source: PubMed Central journal article supplement (PMC4571121; doi:10.1186/s40793-015-0007-z), 2015-06-14
Supplement: 40793_2015_7_MOESM1_ESM.pdf [file 40793_2015_7_MOESM1_ESM.pdf]

## Additional file 1: Associated MIGS record

**Table S1.** Associated MIGS record for *Bradyrhizobium* sp. Ai1a-2

| MIGS-ID        | field name                                 | description                        |
|----------------|--------------------------------------------|------------------------------------|
| <b>MIGS-1</b>  | Submit to INSDC/Trace archives             |                                    |
| 1.1            | PID                                        |                                    |
| 1.2            | Trace Archive                              |                                    |
| <b>MIGS-2</b>  | MIGS CHECK LIST TYPE                       |                                    |
| <b>MIGS-3</b>  | Project Name                               | GEBA - Root<br>Nodulating Bacteria |
| <b>MIGS-4</b>  | Geographic Location                        | Tres Piedras, Costa<br>Rica        |
| 4.1            | Latitude                                   | 9.2835                             |
| 4.2            | Longitude                                  | -83.8533                           |
| 4.3            | Depth                                      |                                    |
| 4.4            | Altitude                                   | 48 m                               |
| <b>MIGS-5</b>  | Time of Sample collection                  |                                    |
| <b>MIGS-6</b>  | Habitat (EnvO)                             | Soil, root nodule, host            |
| 6.1            | temperature                                | 28                                 |
| 6.2            | pH                                         | Not reported                       |
| 6.3            | salinity                                   |                                    |
| 6.4            | chlorophyll                                |                                    |
| 6.5            | conductivity                               |                                    |
| 6.6            | light intensity                            |                                    |
| 6.7            | dissolved organic carbon (DOC)             |                                    |
| 6.8            | current                                    |                                    |
| 6.9            | atmospheric data                           |                                    |
| 6.10           | density                                    |                                    |
| 6.11           | alkalinity                                 |                                    |
| 6.12           | dissolved oxygen                           |                                    |
| 6.13           | particulate organic carbon (POC)           |                                    |
| 6.14           | phosphate                                  |                                    |
| 6.15           | nitrate                                    |                                    |
| 6.16           | sulfates                                   |                                    |
| 6.17           | sulfides                                   |                                    |
| 6.18           | primary production                         |                                    |
| <b>MIGS-7</b>  | Subspecific genetic lineage                |                                    |
| <b>MIGS-9</b>  | Number of replicons                        |                                    |
| <b>MIGS-10</b> | Extrachromosomal elements                  |                                    |
| <b>MIGS-11</b> | Estimated Size                             |                                    |
| <b>MIGS-12</b> | Reference for biomaterial or Genome report |                                    |
| <b>MIGS-13</b> | Source material identifiers                |                                    |
| <b>MIGS-14</b> | Known Pathogenicity                        | Non-pathogen                       |
| <b>MIGS-15</b> | Biotic Relationship                        | Symbiotic                          |
| <b>MIGS-16</b> | Specific Host                              | <i>Andira inermis</i>              |
| <b>MIGS-17</b> | Host specificity or range (taxid)          |                                    |
| <b>MIGS-18</b> | Health status of Host                      |                                    |
| <b>MIGS-19</b> | Trophic Level                              |                                    |
| <b>MIGS-22</b> | Relationship to Oxygen                     | Aerobe                             |

|                |                                 |                                                         |
|----------------|---------------------------------|---------------------------------------------------------|
| <b>MIGS-23</b> | Isolation and Growth conditions | TY media, 28°C,<br>aerobe                               |
| <b>MIGS-27</b> | Nucleic acid preparation        | CTAB                                                    |
| <b>MIGS-28</b> | Library construction            | Illumina Standard PE<br>libraries                       |
| <b>28.1</b>    | Library size                    | 3,250.5 Mbp                                             |
| <b>28.2</b>    | Number of reads                 | 21,669,974                                              |
| <b>28.3</b>    | vector                          |                                                         |
| <b>MIGS-29</b> | Sequencing method               | Illumina HiSeq2000                                      |
| <b>MIGS-30</b> | Assembly                        |                                                         |
| <b>30.1</b>    | Assembly method                 | Velvet version 1.1.04;<br>Allpaths-LG version<br>r42328 |
| <b>30.2</b>    | estimated error rate            |                                                         |
| <b>30.3</b>    | method of calculation           |                                                         |
| <b>MIGS-31</b> | Finishing strategy              |                                                         |
| <b>31.1</b>    | Status                          | Permanent Draft                                         |
| <b>31.2</b>    | coverage                        | 119.7x                                                  |
| <b>31.3</b>    | contigs                         | 247                                                     |
| <b>MIGS-32</b> | Relevant SOPs                   |                                                         |
| <b>MIGS-33</b> | Relevant e-resources            |                                                         |
